# Supplementary material for: Functional Connectivity-Derived Optimal Gestational-Age Cut Points for Fetal Brain Network Maturity
Source: MDPI journal article supplement (doi:10.3390/brainsci11070921), 2021-07-12
Supplement: s1 [file s1]

**Table S1.** Female Stratified Modeled Bootstrapped Estimates and 95% Confidence Intervals at select Gestational Age Cut Points

| Met ric   | Estimate            | GA at Scan = 28    | GA at Scan = 29     | GA at Scan = 30    | GA at Scan = 31    | GA at Scan = 32     | GA at Scan = 33    |
|-----------|---------------------|--------------------|---------------------|--------------------|--------------------|---------------------|--------------------|
| Q         | -0.0034             | -0.0951            | -0.0985             | -0.1019            | -0.1053            | -0.1087             | -0.1121            |
|           | (-0.0197 - 0.0058)  | (-0.5518 - 0.1629) | (-0.5715 - 0.1687)  | (-0.5912 - 0.1746) | (-0.6109 - 0.1804) | (-0.6306 - 0.1862)  | (-0.6503 - 0.1920) |
| GE        | -0.0002             | -0.0065            | -0.0067             | -0.007             | -0.0072            | -0.0074             | -0.0077            |
|           | ( -0.0021 - 0.0003) | (-0.0580 - 0.0083) | (-0.0600 - 0.0086)  | (-0.0621 - 0.0089) | (-0.0642 - 0.0092) | (-0.0662 - 0.0095)  | (-0.0683 - 0.0098) |
| LE        | 0.0006              | 0.0158             | 0.0164              | 0.0169             | 0.0175             | 0.0181              | 0.0186             |
|           | (-0.0008 - 0.0052)  | (-0.0235 - 0.1466) | ( -0.0243 - 0.1519) | (-0.0252 - 0.1571) | (-0.0260 - 0.1624) | (-0.0268 - 0.1676)  | (-0.0277 - 0.1728) |
| $\gamma$  | -0.0098             | -0.2753            | -0.2851             | -0.2949            | -0.3048            | -0.3146             | -0.3244            |
|           | (-0.0139 - 0.0013)  | (-0.3894 - 0.0370) | (-0.4033 - 0.0383)  | (-0.4172 - 0.0396) | (-0.4311 - 0.0409) | (-0.4450 - 0.0423)  | (-0.4589 - 0.0436) |
| $\lambda$ | 0.001               | 0.0291             | 0.0302              | 0.0312             | 0.0322             | 0.0333              | 0.0343             |
|           | (-0.0010 - 0.0088)  | (-0.0291 - 0.2454) | (-0.0301 - 0.2541)  | (-0.0311 - 0.2629) | (-0.0322 - 0.2717) | ( -0.0332 - 0.2804) | (-0.0342 - 0.2892) |
| $\sigma$  | -0.0084             | -0.2349            | -0.2432             | -0.2516            | -0.26              | -0.2684             | -0.2768            |
|           | (-0.0125 - 0.0009)  | (-0.3512 - 0.0260) | (-0.3638 - 0.0269)  | (-0.3763 - 0.0279) | (-0.3888 - 0.0288) | (-0.4014 - 0.0297)  | (-0.4139 - 0.0307) |

**Table S2.** Male Stratified Modeled Bootstrapped Estimates and 95% Confidence Intervals at select Gestational Age Cut Points

| Met ric   | Estimate           | GA at Scan = 28     | GA at Scan = 29    | GA at Scan = 30    | GA at Scan = 31    | GA at Scan = 32    | GA at Scan = 33    |
|-----------|--------------------|---------------------|--------------------|--------------------|--------------------|--------------------|--------------------|
| Q         | -0.0048            | -0.1332             | -0.1379            | -0.1427            | -0.1474            | -0.1522            | -0.1569            |
|           | (-0.0120 - 0.0023) | (-0.3355 - 0.0634)  | (-0.3474 - 0.0657) | (-0.3594 - 0.0680) | (-0.3714 - 0.0702) | (-0.3834 - 0.0725) | (-0.3954 - 0.0748) |
| GE        | 0.0006             | 0.0158              | 0.0164             | 0.0169             | 0.0175             | 0.0181             | 0.0186             |
|           | (-0.0001 - 0.0010) | ( -0.0032 - 0.0285) | (-0.0034 - 0.0296) | (-0.0035 - 0.0306) | (-0.0036 - 0.0316) | (-0.0037 - 0.0326) | (-0.0038 - 0.0336) |
| LE        | -0.0012            | -0.0347             | -0.036             | -0.0372            | -0.0385            | -0.0397            | -0.0409            |
|           | (-0.0020 - 0.0002) | (-0.0552 - 0.0045)  | (-0.0571 - 0.0047) | (-0.0591 - 0.0049) | (-0.0611 - 0.0050) | (-0.0630 - 0.0052) | (-0.0650 - 0.0053) |
| $\gamma$  | -0.0025            | -0.0687             | -0.0711            | -0.0736            | -0.076             | -0.0785            | -0.0809            |
|           | (-0.0268 - 0.0341) | (-0.7514 - 0.9551)  | (-0.7782 - 0.9892) | (-0.8051 - 1.0233) | (-0.8319 - 1.0574) | (-0.8587 - 1.0915) | (-0.8856 - 1.1256) |
| $\lambda$ | -0.0023            | -0.0645             | -0.0668            | -0.0691            | -0.0714            | -0.0737            | -0.076             |
|           | (-0.0035 - 0.0004) | (-0.0979 - 0.0119)  | (-0.1014 - 0.0124) | (-0.1048 - 0.0128) | (-0.1083 - 0.0132) | (-0.1118 - 0.0136) | (-0.1153 - 0.0141) |
| $\sigma$  | -0.0023            | -0.0633             | -0.0656            | -0.0678            | -0.0701            | -0.0724            | -0.0746            |
|           | (-0.0343 - 0.0310) | (-0.9598 - 0.8668)  | (-0.9941 - 0.8977) | (-1.0283 - 0.9287) | (-1.0626 - 0.9596) | (-1.0969 - 0.9906) | (-1.1312 - 1.0215) |

## Supplementary Figures

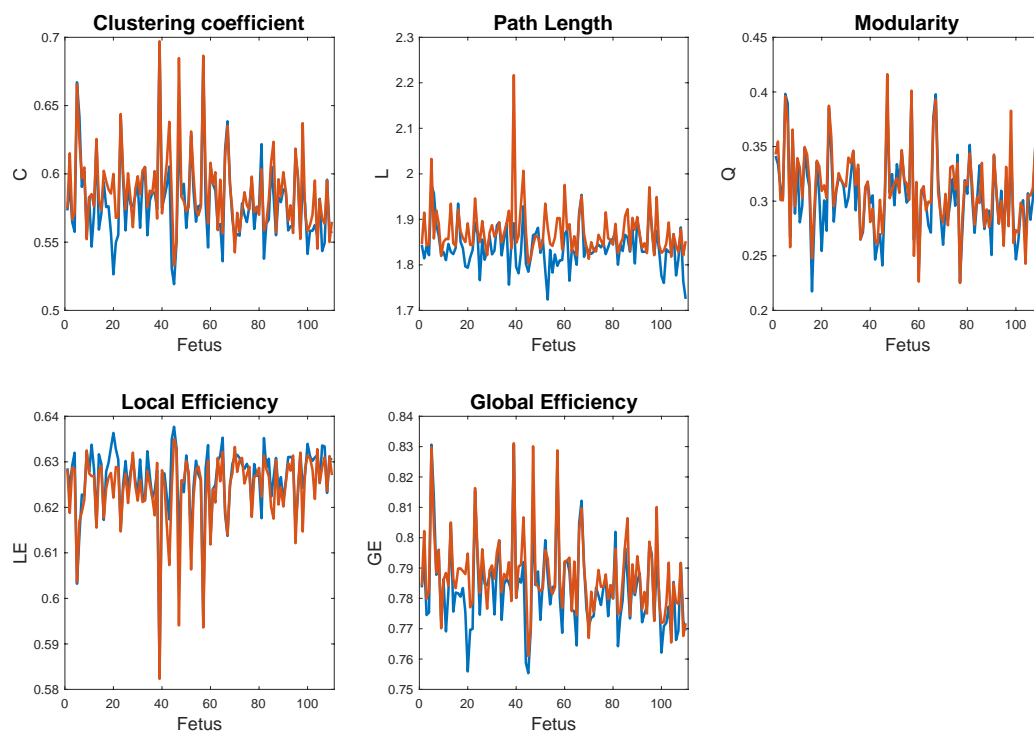

**Figure S1.** Correlation network metrics computed from full (blue) vs partial (red) time series data.

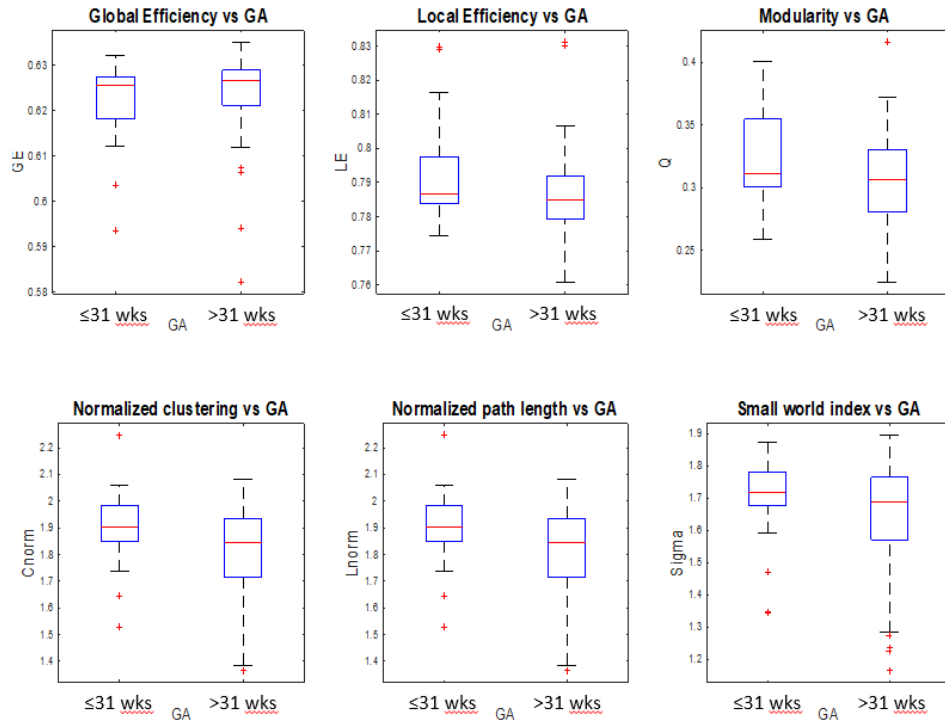

**Figure S2.** Global network metrics and gestational cut-points.
